# Supplementary material for: Exoerythrocytic Plasmodium Parasites Secrete a Cysteine Protease Inhibitor Involved in Sporozoite Invasion and Capable of Blocking Cell Death of Host Hepatocytes
Source: PubMed Central journal article supplement (PMC2845656; doi:10.1371/journal.ppat.1000825), 2010-03-26
Supplement: ppat.1000825.s001.pdf [file ppat.1000825.s001.pdf]

PbICP MKSITFFVFNICSLALLSHCEDNDIYSFDIVNETNWLKIAKNIKFKGKSPSNFTIIPFNN 60  
PyICP MKSITFFVFNICSLALLSHCEDRDLYSFDIVNETSWLKIAKNIKFKGKSPSNFTIIPFNN 60  
Falstatin MNLLVFFCFLLSCIVHLRSCSDNNSYSFEIVNRSWLNIAERIKFGNAPFNFTIIPYNY 60  
Toxostatin-1 MLAPTFFFF-----VPLFLCDP--CFAPANKRACGFFSCDFLLRSPFMFQLRLSVF-- 50  
Toxostatin-2 MQTLKLSRALMPLTVVAFLLSFSVASCRQGTSPRAGTAGDGETCTETPVIISFLPVSGPE 60

PbICP TGSSNDNESKEESVLLIRKKIKS-----NKNHDSII----- 93  
PyICP TGSSDNEGDKEESVLLIRKKIKS-----NTKHGSNII----- 93  
Falstatin VNNSTE-ENNNKDSVLLISKLNKNSNPVDENNIIDSTKKNNSNNNNNSNIVGIYESQ 119  
Toxostatin-1 -----LLLVLSATTS----- 60  
Toxostatin-2 HPAGGS--QRDDA----- 71

PbICP -SGDVTNGDIS---DLNYTASNFSDN-----SEDIEDNQKYPTTSYNS----- 132  
PyICP -SDDSVNDNISNL-SLNSTASNFSDN-----NEEIEDNQKYPTTSYNS----- 134  
Falstatin VHEEKIKEDNTRQDNINKKENEIINNHHQIPVSNIPFSENIDNNKNIYESNYKSTYNNPE 179  
Toxostatin-1 -----LCPACVHG----- 69  
Toxostatin-2 -----

PbICP -----FNHLNSNIAFNEESEYI-----EINSESDLENKIKDINIKSNLEENNTMNESE- 180  
PyICP -----FNDPNSNISFNEESEFS-----EIDSESNLENNIKDINIKSNLEENNTMNEIDN 183  
Falstatin LIHSTDFIGSNNHTFNFLSRYNNSVLNMQGNTKVPGNVPELKARIFSEENTEVEESA- 238  
Toxostatin-1 -----AESPTMEEKVKVTFTTDP----- 88  
Toxostatin-2 -----

PbICP KVDSKYELTGDEKCGKSLKLGNISNQTNETITQSLVSGEILCIDLEGNAGTG-YLWVLLG 240  
PyICP KVDSKYELTGDEKCGNSLKLGNISNQTNETITQSLVSGEITFCIDFEANAGTG-YI WALIG 243  
Falstatin ENNHTNSLNPNECDQIIKLGDIINSVNEKIISINSTVNNVLCINLDSVNGNG-FVWTLIG 298  
Toxostatin-1 -----HDKVYTTVNVSSIPAHLLKLLIESSAGSGGYAFMAHD 125  
Toxostatin-2 -----ALEAGARTIPKIHFAHGRARAAQEKPLKVEFPATLGTG-YTLVVLD 116  
LmICP -----MIAPLSVK-DND-----KWVDTHVGKTEIHLKGNPTG-YMWTRVG 40  
TbICP -----MSHNLFTEDNN-----KTIRMVIGETFTIELESNPTG-YTWLRSG 41  
Chagasin -----MSHKTAKAHNG-----ATITVAVGEIVETQLPSNPTG-FMWFEG 40  
EhICP-1 -----MSLTEDNN-----TTITIAKGENKEIILHGNPTG-YSWVVD 38  
EhICP-2 -MKQFIFFALLCTSTYAAIHILTEKE---DHATLHISFNDLIKIQLRTNPSTG-YAWNIEY 56

PbICP IHKDEPIINPENFPKTKKSFSEESVTPQPKY-KIDEHDSKKNVNREIESPEQKESD 299  
PyICP VHKNEPIINPENFPKTKKPYFSEESVTPQPKY-KIDEHDSKKNVDKENESQDQKESD 302  
Falstatin VHKKKPLIDPSNFPKTRVTSYVSPDISVTNPVPIPKNSNTNKDDSIKNDGSONNTTN 358  
Toxostatin-1 VLKG-----INRQPSLELEPLAEDEMRERLQRSVSKHGVTGKPAIEHMKN----- 171  
Toxostatin-2 VYRGLDFPLSFRDEIRQKLGKGRGRDAPITPASEQ-KEEKQEEKAKTEGETSGEDGIED 175  
LmICP -FVGK-----DVLSEILEVCKYK---E--TPSS----- 64  
TbICP -LAG-----TELSCTFAIQSKFNNRAPHDNHKNH----- 70  
Chagasin -GTK-----ESPNESMFTVENKYF---E--PDS----- 62  
EhICP-1 -CEG-----LSNTVEYVADQHA---E----- 55  
EhICP-2 -PTD-----TFSLSQDTIKAEPH---E----- 74

PbICP -----SKPKKPMQLLGGPDRMRSVIK 321  
PyICP -----SKPKKPMHLLGGPDRMRSVIK 324  
Falstatin -----HFPPK-PREQLVGGSSMLISKIK 379  
Toxostatin-1 -----MPGAPQTYAAPVE 184  
Toxostatin-2 VLFLKVFAEPTKKGVVVSSPEKSMRSTFSTVETARGKMRRESY-YESEIS 225  
LmICP -----TPMVGVGGIY--VVLVK 79  
TbICP -----RRLVVGAGGT--MVLEVK 86  
Chagasin -----KLLGACGT--EHFVVT 76  
EhICP-1 -----GICCCGKY--HIKIT 69  
EhICP-2 -----SCMVGFPSIREIQLK 89

PbICP GHKPGKYYIVYSYRPFSPSTGANTKIIVTVQ- 354  
PyICP GHKAGKYYIVYSYRPFSPSTGANTKIIVTVQ- 357  
Falstatin PHKPGKYFIVYSYRPFDPTRDNTNRIVELNVQ- 412  
Toxostatin-1 VTQVGDYTVIVSSVRPWAPRDAAGYVVHIIHATD 218  
Toxostatin-2 SEVPQDFAVAFALVRPWKLSDQPVFVALVHFD- 258  
LmICP PRKRGHHTLVLVTRPFEIGIKPENERTLHLNVK- 113  
TbICP ALKAGKHTLSLAYGRPWVGFNAAKRYNIHVEATA 121  
Chagasin VKAAGTHAVNLAVRPGWGPSHDSERFTVYLKAN- 110  
EhICP-1 GTQTGEGKIVLVRRPWAPN-ANDRTFTLKVNVQ- 102  
EhICP-2 PLKVGTTIKLGYSRPWEKGEPLRSLTYSVVIR- 123
