# Supplementary material for: Exoerythrocytic Plasmodium Parasites Secrete a Cysteine Protease Inhibitor Involved in Sporozoite Invasion and Capable of Blocking Cell Death of Host Hepatocytes
Source: PubMed Central journal article supplement (PMC2845656; doi:10.1371/journal.ppat.1000825), 2010-03-26

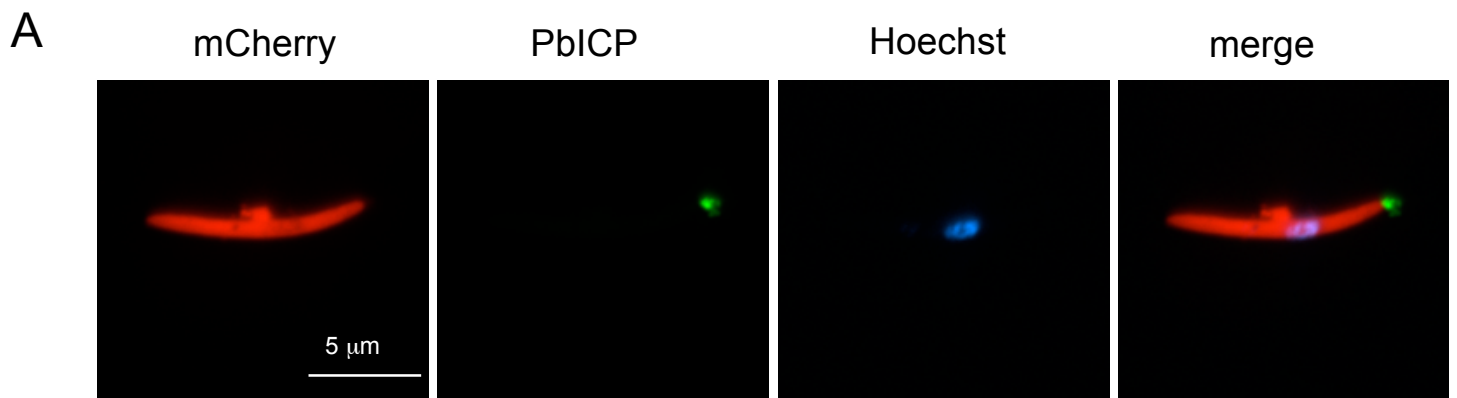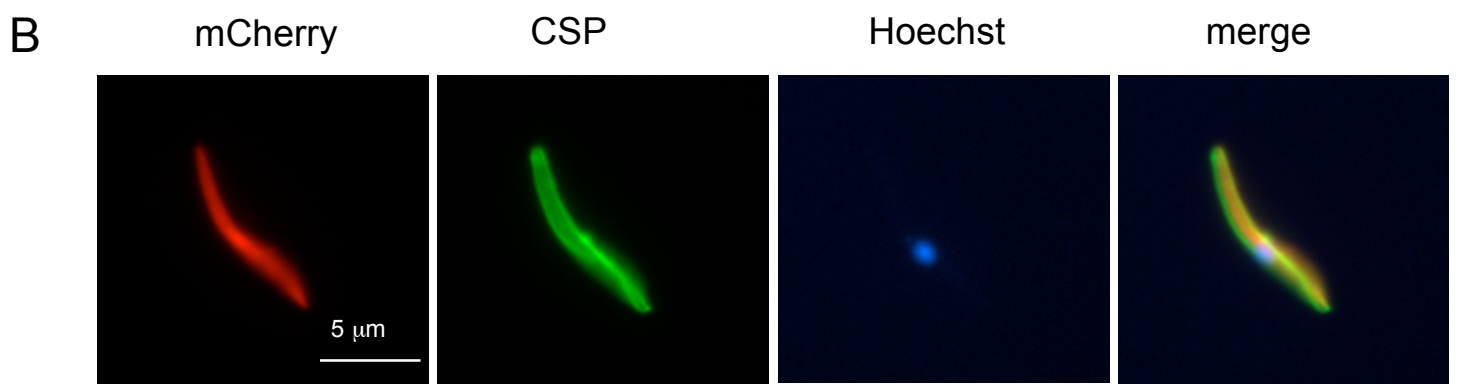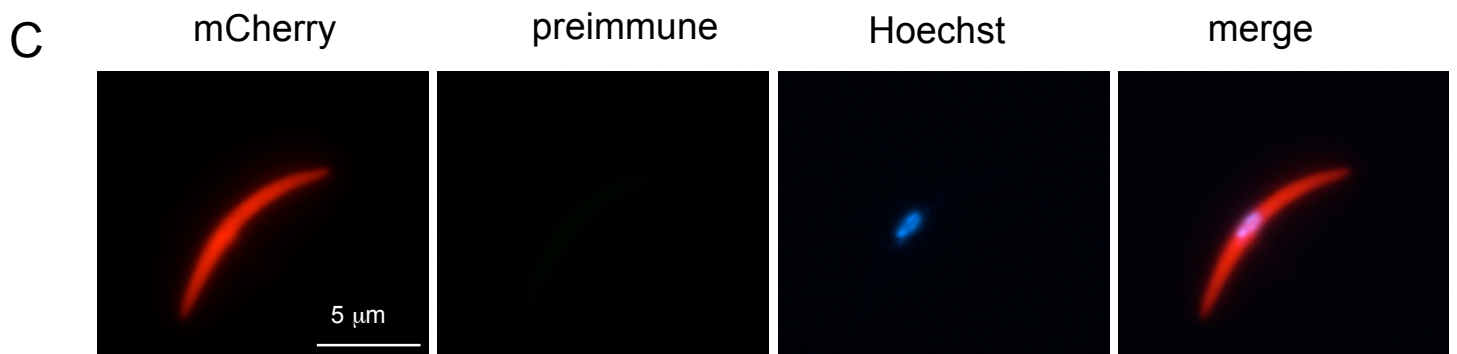

Supplement: ppat.1000825.s005.pdf [file ppat.1000825.s005.pdf]
