# Supplementary material for: Exoerythrocytic Plasmodium Parasites Secrete a Cysteine Protease Inhibitor Involved in Sporozoite Invasion and Capable of Blocking Cell Death of Host Hepatocytes
Source: PubMed Central journal article supplement (PMC2845656; doi:10.1371/journal.ppat.1000825), 2010-03-26

frequency of the phenotype

47.9 ± 14.1 %

0.9 ± 1.5 %

2.6 ± 2.2 %

3.7 ± 1.8 %

44.9 ± 14.9 %

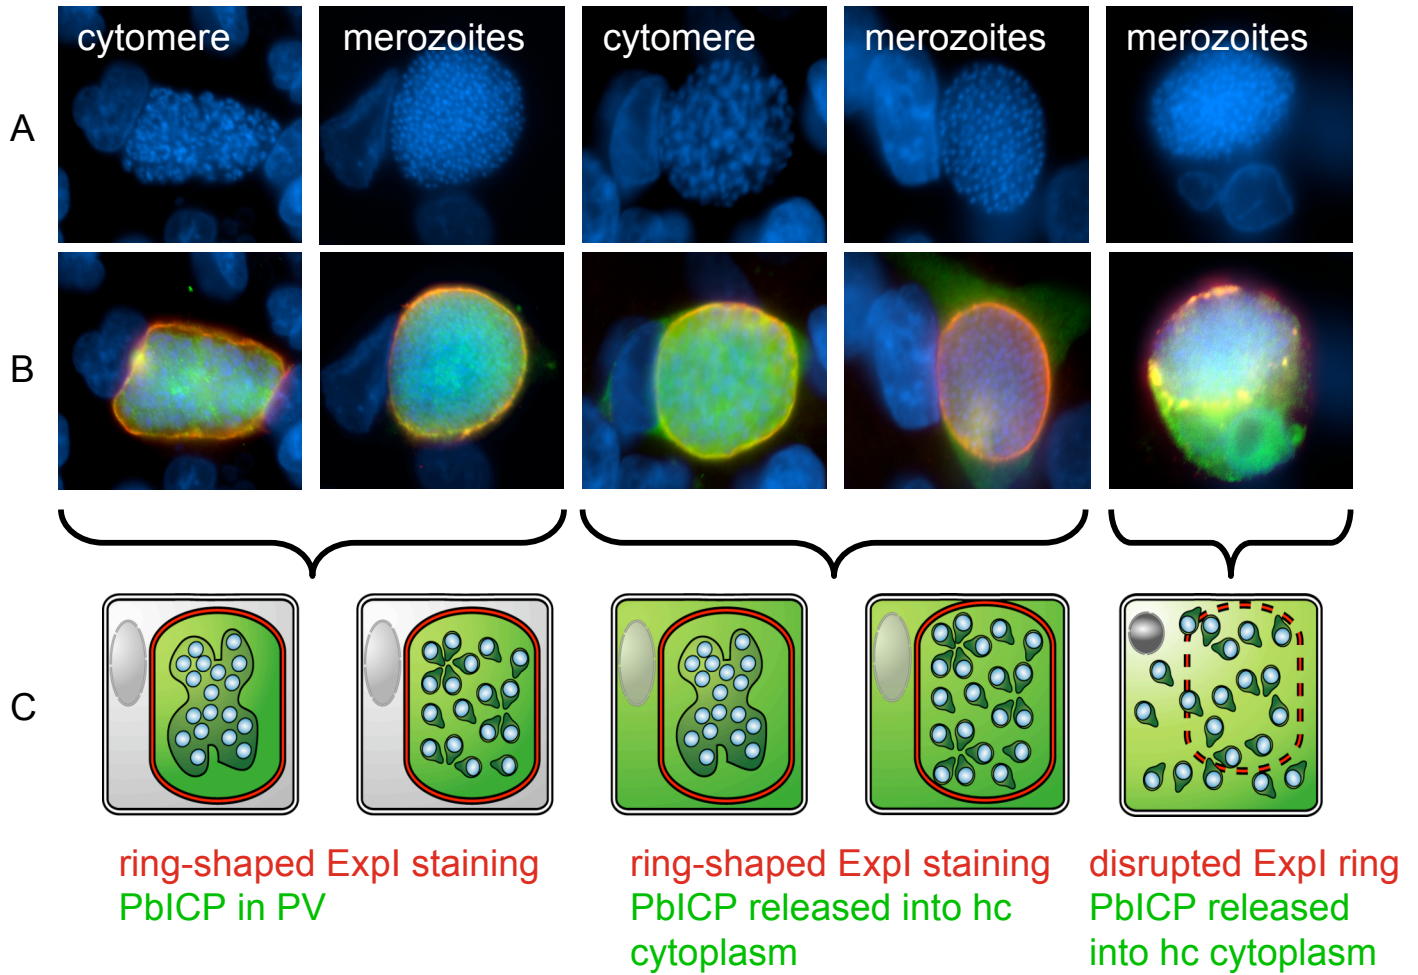

Supplement: ppat.1000825.s010.pdf [file ppat.1000825.s010.pdf]
